# Supplementary material for: Identification of a novel tRNA wobble uridine modifying activity in the biosynthesis of 5-methoxyuridine
Source: PubMed Central journal article supplement — Nucleic Acids Res. 2018 Jun 30;46(17):9160–9. doi: 10.1093/nar/gky592 (PMC6158493; doi:10.1093/nar/gky592), 2018-06-30
Supplement: gky592_supplemental_figures.pdf [file gky592_supplemental_figures.pdf]

## Supplementary material

### Identification of a novel tRNA wobble uridine modifying activity in the biosynthesis of 5-methoxyuridine

Huijeong Ryu<sup>1</sup>, Tyler L. Grove<sup>2</sup>, Steven C. Almo<sup>2</sup> and Jungwook Kim<sup>1\*</sup>

<sup>1</sup>Department of Chemistry, Gwangju Institute of Science and Technology, Gwangju, 61005, Korea.

<sup>2</sup>Department of Biochemistry, Albert Einstein College of Medicine, Bronx, NY 10461, USA.

\*Corresponding author (jwkim@gist.ac.kr).

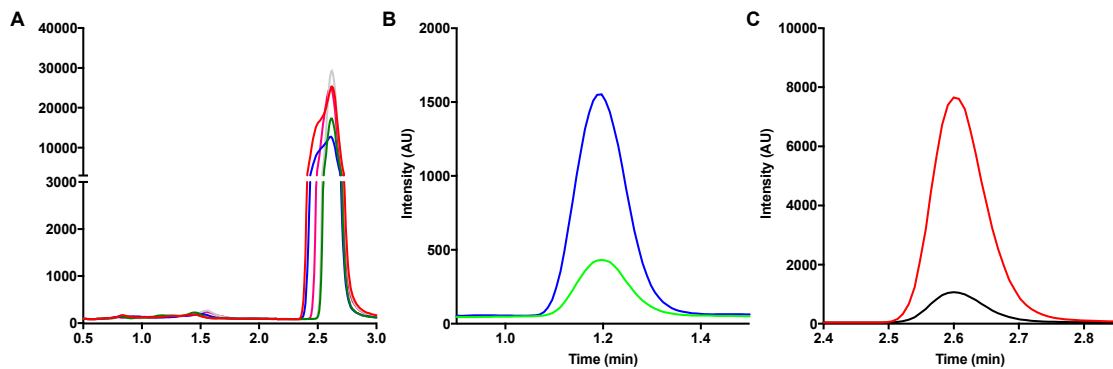

**Supplementary Figure 1. *In vivo* production of *mo*<sup>5</sup>U by *B. subtilis* deletion strains.** **A)** The presence of *mo*<sup>5</sup>U in total RNA extracted from *B. subtilis* and the single knockout mutants was examined by LC-MS. The  $\Delta yodH$ ,  $\Delta ydaC$ ,  $\Delta yibH$ ,  $\Delta yrhH$ ,  $\Delta ycgJ$ ,  $\Delta yacO$ , and  $\Delta yrrT$  strains of *B. subtilis* all produce *mo*<sup>5</sup>U (peak at 2.7 min). **B)** LC-MS MRM parent peak to product peak transitions used to monitor *ho*<sup>5</sup>U. The blue trace is the *m/z* transition of 261.1 to 129.2. The green trace is the *m/z* transition of 261.1 to 133.1. **C)** LC-MS MRM transitions used to monitor *mo*<sup>5</sup>U. The red trace is the *m/z* transition of 275.1 to 143.1. The black trace is the *m/z* transition of 275.1 to 97.8.

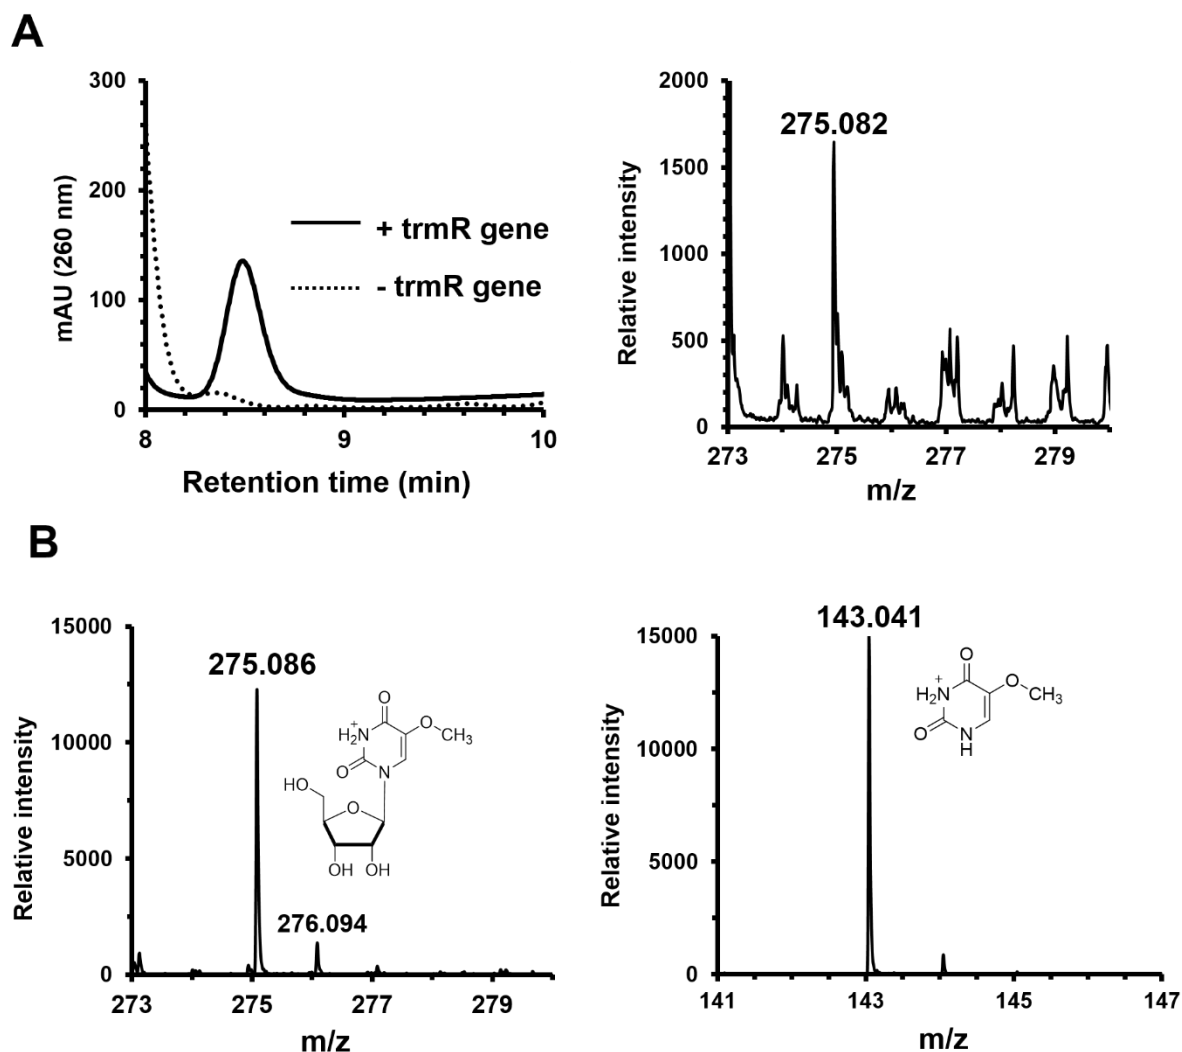

**Supplementary Figure 2. Substrate specificity of TrmR against *E. coli* tRNA.** (A) (left) *In vivo* ho<sup>5</sup>U methylation was confirmed by analyzing HPLC trace of mo<sup>5</sup>U from total RNA, extracted from *cmoB*-deficient *E. coli* cells complemented with *trmR*-expressing plasmid (+ *trmR*). RNAs from mutant cells complemented with an empty vector (- *trmR*) were analyzed as negative control. (right) The *m/z* peak corresponding to mo<sup>5</sup>U ([C<sub>10</sub>H<sub>15</sub>O<sub>7</sub>N<sub>2</sub>]<sup>+</sup>, *m/z* = 275.08) was observed in + *trmR* sample only by LC-MS. (B) *In vitro* methylation of ho<sup>5</sup>U-containing tRNAs from *E. coli* was confirmed by LC-MS/MS analysis, where the parent peak (left), and its major fragment peak (right), 5-methoxyuracil ([C<sub>5</sub>H<sub>7</sub>N<sub>2</sub>O<sub>3</sub>]<sup>+</sup>, *m/z* = 143.04), are shown.

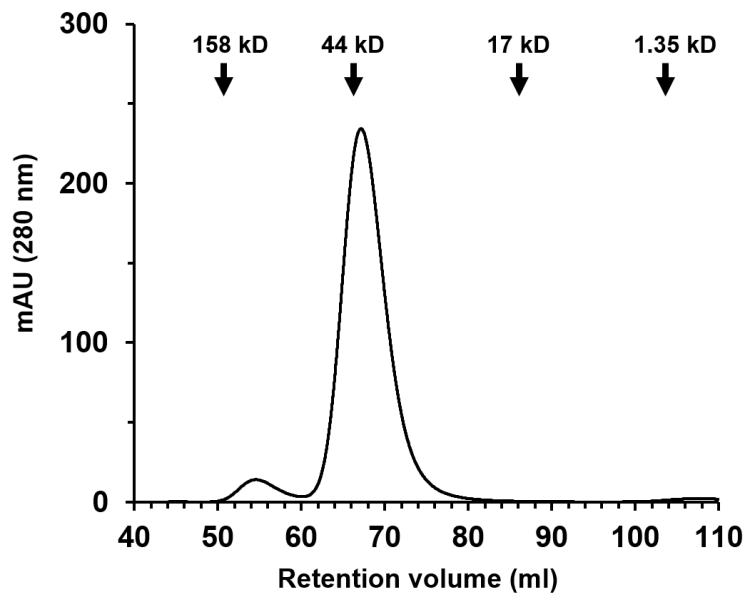

**Supplementary Figure 3. Representative gel filtration profile of purified recombinant *B. subtilis* TrmR.** Arrows indicate the elution volumes of standard proteins; Vitamin B12 (1.35 kD), Myoglobin from horse (17 kD), Ovalbumin from chicken (44 kD) and bovine  $\gamma$ -globulin (158 kD). Elution volume of *B. subtilis* TrmR is estimated to be  $64 \pm 0.8$  ml (an average  $\pm$  standard deviation from three measurements).

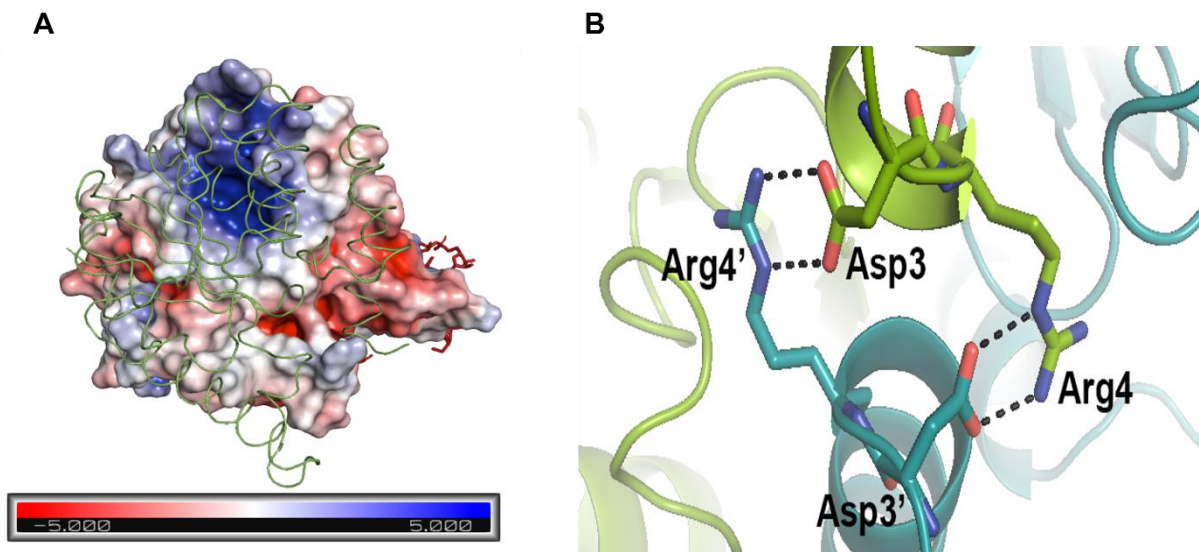

**Supplementary Figure 4. Homodimeric interface within TrmR-ASL<sup>Ala</sup> structure**

(A) One subunit is presented with solvent accessible surface, whereas the other subunit is shown as backbone trace in green for clear visualization of the dimeric interface. Distribution of electrostatic potential is mapped on the protein surface. Color bar of blue, red and white are indicated positive, negative and neutral electrostatic potential. (B) Salt bridge at the dimeric interface between a pair of Asp-3 and Arg-4.

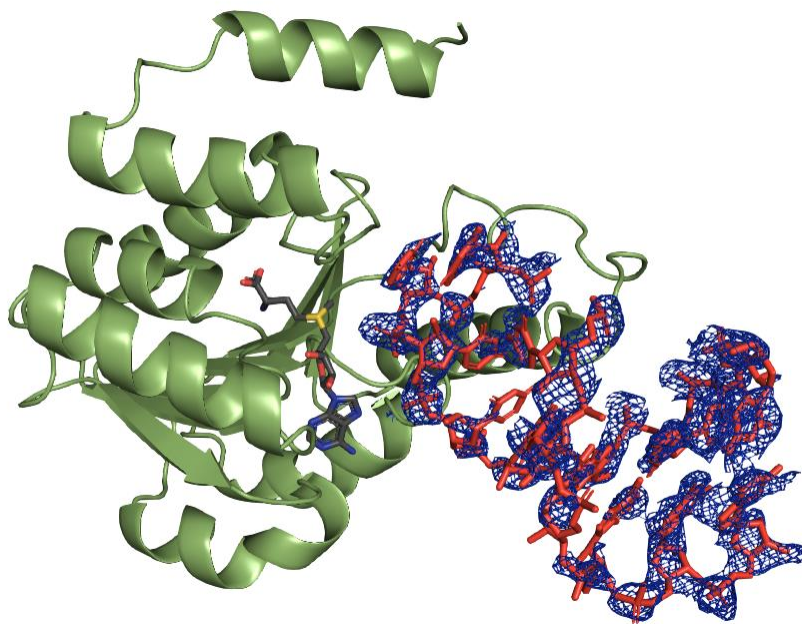

**Supplementary Figure 5. Omit electron density map of tRNA.** Fourier difference map ( $F_o - F_c$ ) was calculated without modeling tRNA during refinement and displayed as blue mesh contoured at 2.0 sigma.

## A.

### Four Box tRNA Sets

| Isotype | tRNA Count by Anticodon |          |     |          | Total |
|---------|-------------------------|----------|-----|----------|-------|
| Ala     | AGC                     | GGC<br>1 | CGC | TGC<br>5 | 6     |
| Pro     | AGG                     | GGG      | CGG | TGG<br>3 | 3     |
| Thr     | AGT                     | GGT<br>1 | CGT | TGT<br>4 | 5     |
| Val     | AAC                     | GAC<br>1 | CAC | TAC<br>4 | 5     |

### Six Box tRNA Sets

| Isotype | tRNA Count by Anticodon |          |     |          |     |          | Total |
|---------|-------------------------|----------|-----|----------|-----|----------|-------|
| Ser     | AGA                     | GGA<br>1 | CGA | TGA<br>2 | ACT | GCT<br>2 | 5     |

## B.

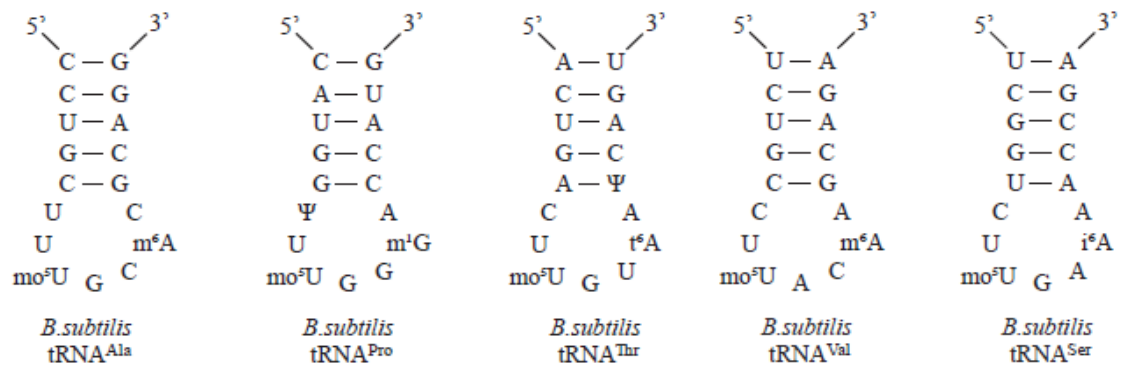

**Supplementary Figure 6.** (A) Number of copies of tRNA genes for Ala-, Pro-, Thr-, Val- and Ser-specific isoacceptors in *B. subtilis* genome. Anticodons to be modified to mo<sup>5</sup>U are highlighted in red. (B) Secondary structures of anticodon stem loops with mo<sup>5</sup>U34 in *B. subtilis*.

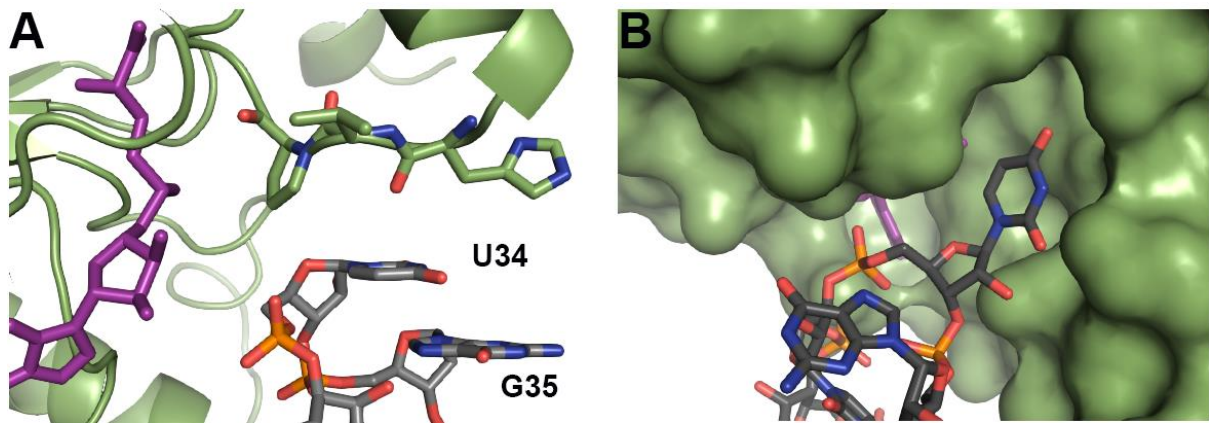

**Supplementary Figure 7. Conformation of the wobble uridine in the TrmR active site.** A) In TrmR-ASL<sup>Ala</sup> structure, the wobble uridine is sandwiched between G35 and a short peptide loop (His-34, Val-35, and Pro-36), resulting in an inactive conformation. B) In 'base-flipped' model, uracil base of wobble uridine is in attack-ready conformation. Nearby SAM is presented in purple.



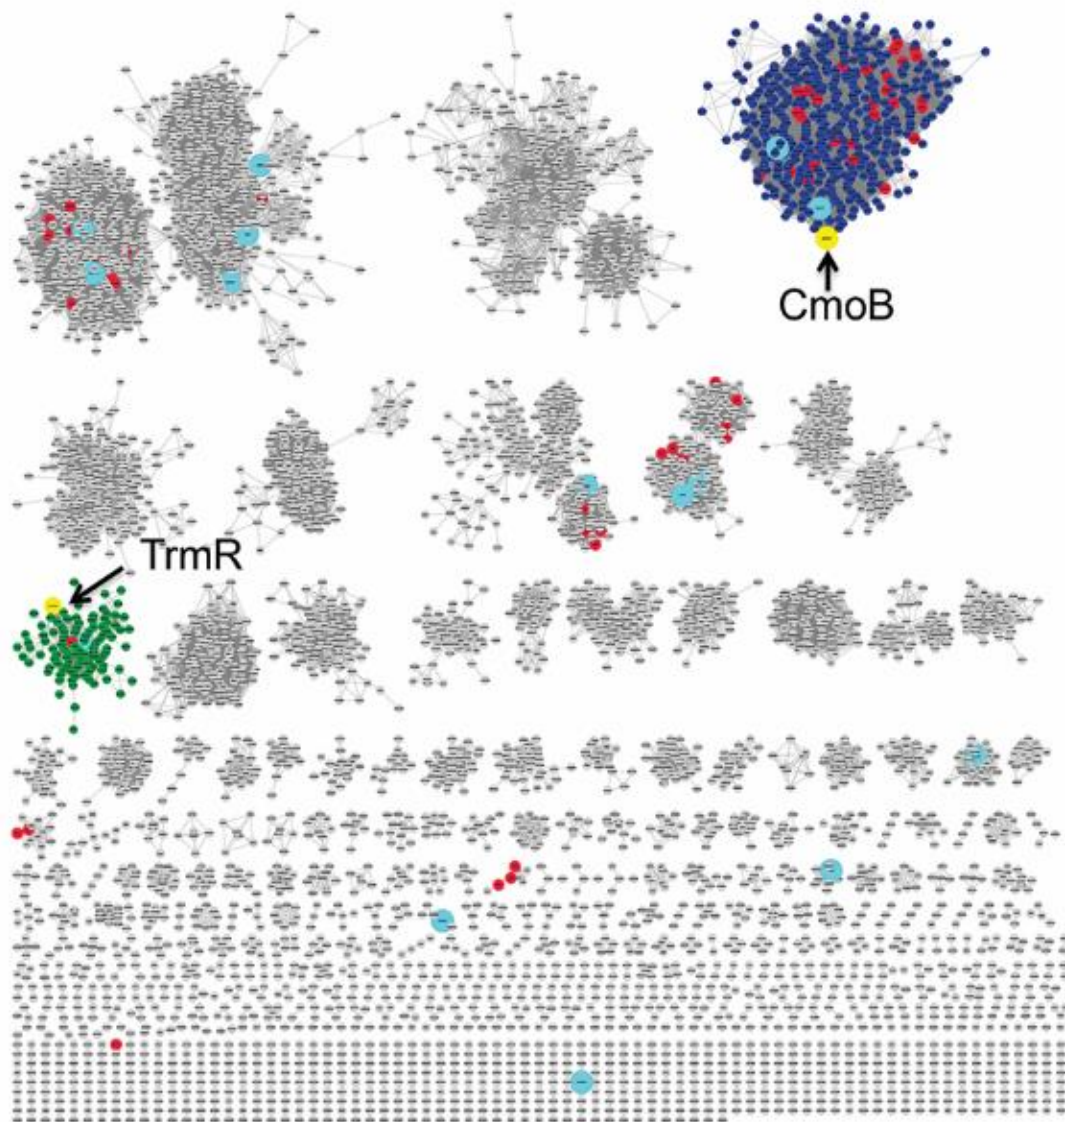

**Supplementary Figure 8. Presentation of sequence similarity network of PF08003 and PF01596.** Members of Methyltransf\_9 (PF08003, which includes CmoB) and Methyltransf\_3 (PF01596, which includes TrmR) were combined and their sequence similarity was analyzed. After filtering peptides smaller than 150 amino acids, a total of 24,846 sequences were aligned using EFI-Enzyme Similarity Tool (<https://efi.igb.illinois.edu/efi-est/>) at the E-value of -60, and RepNode of 50%, which resulted in 5,164 nodes and 93,823 edges. Nodes in 'TrmR cluster' are highlighted in green, whereas those in 'CmoB cluster' are in navy. Red nodes indicate Swiss-Prot annotated sequences, and teal nodes contain sequences with a structure. Nodes containing TrmR and CmoB are labeled in yellow. MdmC and caffeoyl-CoA-O-MTase described in the main text are located in the upper left cluster.
